# Supplementary figures and images for: A Multicentric Observational Study to Determine Myocardial Injury in Severe Community-Acquired Pneumonia (sCAP)
Source: MDPI journal article supplement (doi:10.3390/antibiotics12121710), 2023-12-08

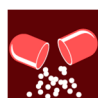

Supplementary material.

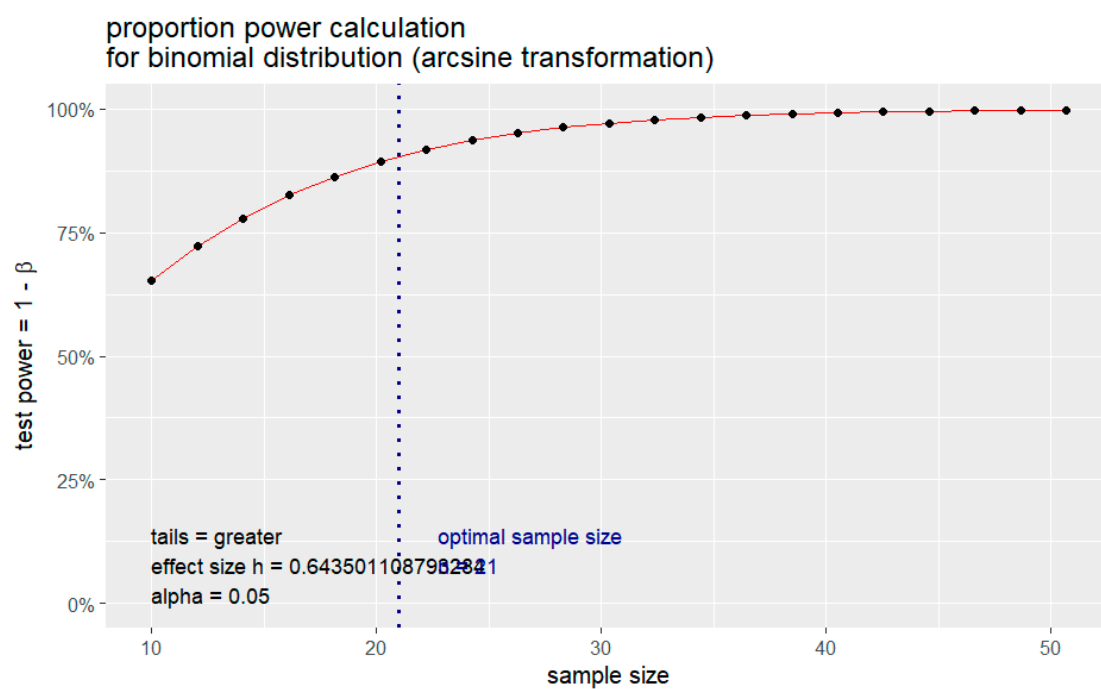

Figure S1. Power calculation analysis.

Supplement: s1 [file s1]
